# Supplementary material for: Metal–organic frameworks constructed from imidazole dicarboxylates bearing aromatic substituents at the 2-position
Source: Royal Society of Chemistry journal article supplement (doi:10.1039/c2ce25912e), 2012-01-01
Supplement: c2ce25912e.pdf [file c2ce25912e.pdf]

# Metal-organic frameworks constructed with imidazole dicarboxylates bearing aromatic substituents at the 2-position

Yu Zhang, Xiaobo Luo, Zeli Yang, Gang Li \*

## Supporting Information

Table S1. Hydrogen bond distances (Å) and angles (deg) for 1-7.

| D-H...A             | d(H...A)  | d(D...A) | ∠(DHA)    |
|---------------------|-----------|----------|-----------|
| <b>1</b>            |           |          |           |
| O(5)-H(5B)...N(2)#2 | 2.38(4)   | 2.941(7) | 124(4)    |
| O(5)-H(5B)...O(2)#1 | 2.31(5)   | 3.044(7) | 145(7)    |
| O(5)-H(5A)...O(1)#3 | 2.02      | 2.874(7) | 179.5     |
| <b>2</b>            |           |          |           |
| O(7)-H(7B)...O(1)#3 | 1.81(3)   | 2.648(2) | 169(3)    |
| O(8)-H(8A)...O(8)#4 | 2.40(2)   | 2.974(5) | 127(2)    |
| O(8)-H(8B)...O(7)#5 | 2.325(13) | 3.117(3) | 160(2)    |
| O(6)-H(6B)...O(5)#6 | 1.944(10) | 2.783(2) | 171(2)    |
| O(6)-H(6A)...O(1)#2 | 1.928(10) | 2.770(2) | 173.9(18) |
| N(2)-H(2)...O(8)#1  | 2.04      | 2.896(3) | 174.8     |
| O(5)-H(5)...O(3)#7  | 1.89      | 2.702(2) | 169.8     |
| <b>3</b>            |           |          |           |
| O(5)-H(5)...O(1)#1  | 2.19      | 2.910(2) | 146.3     |

---

|                       |           |          |          |
|-----------------------|-----------|----------|----------|
| O(5)-H(5)...O(2)#1    | 2.35      | 2.912(2) | 126.5    |
| O(10)-H(10)...O(7)#3  | 1.81      | 2.626(8) | 170.9    |
| <b>4</b>              |           |          |          |
| O(2)-H(2)...O(3)      | 1.65      | 2.461(4) | 171.7    |
| O(5)-H(5)...O(11)     | 1.94      | 2.752(5) | 170.1    |
| O(8)-H(8A)...O(7)     | 1.64      | 2.462(4) | 175.5    |
| O(10)-H(10)...O(6)#2  | 2.07      | 2.884(4) | 169.3    |
| O(10)-H(10)...O(7)#2  | 2.61      | 3.171(4) | 127.5    |
| O(11)-H(11A)...O(7)#3 | 2.11      | 2.956(4) | 179.3    |
| O(11)-H(11B)...O(9)#4 | 2.44      | 2.977(4) | 121.8    |
| <b>5</b>              |           |          |          |
| O(5)-H(5A)...O(2)#1   | 2.21      | 3.060(4) | 179.6    |
| O(5)-H(5B)...N(1)#2   | 1.97      | 2.803(4) | 167.0    |
| N(2)-H(2)...O(5)#1    | 2.20(4)   | 2.987(4) | 170.0(4) |
| <b>7</b>              |           |          |          |
| O(8)-H(8)...O(5)#4    | 2.02      | 2.836(7) | 176.6    |
| O(6)-H(1W)...O(4)#5   | 1.91(6)   | 2.796(4) | 170(6)   |
| O(6)-H(1W)...O(9)#5   | 2.47(6)   | 3.120(4) | 130(5)   |
| O(5)-H(3W)...O(7)#6   | 2.310(15) | 3.146(8) | 170(7)   |
| O(5)-H(2W)...O(6)     | 2.40(4)   | 3.187(8) | 155(8)   |
| O(7)-H(5W)...O(1)#6   | 2.09(4)   | 2.817(4) | 144(6)   |
| O(7)-H(4W)...O(6)     | 2.39(11)  | 2.817(5) | 111(9)   |

---

|                     |         |          |         |
|---------------------|---------|----------|---------|
| O(7)-H(4W)...O(9)#5 | 2.43(5) | 3.213(5) | 154(10) |
|---------------------|---------|----------|---------|

---

Symmetry codes for **1** #1  $-x+1, y+1/2, -z+1/2$ ; #2  $-x+1, -y-1/2, -z+1/2$ ; #3  $-x+1, -y, -z+1$ ; For **2**: #1:  $x, -y+1/2, z+1/2$ . #2:  $x, -y+1/2, z-1/2$ . #3:  $x+1, y, z+1$ . #4:  $-x+2, -y+1, z$ . #5:  $x+1, y, z$ . #6:  $-x+2, -y+1, z$ . #7  $-x+1, y+1/2, -z+1$ . For **3**: #1:  $2-x, 1/2+y, 1/2-z$ . #3:  $x-1/2, -y+3/2, z$ . For **4**: #1:  $2-x, 1/2+y, 1/2-z$ . #2:  $2-x, -1/2+y, 1/2-z$ . #3:  $x-1, y, z$ . #4  $-x+2, -y+1, -z+1$  For **5**: #1:  $1-x, -1/2+y, 1/2-z$ . #2:  $1-x, -y, -z$ . For **7**: #4  $y+2/3, -x+y+1/3, -z+7/3$ . #5  $x-y-1/3, x-2/3, -z+7/3$ . #6  $-x+y+4/3, -x+2/3, z-1/3$ .

**Table S2. NBO Charge Distributions of the Free Ligands H<sub>3</sub>PhIDC, H<sub>3</sub>HOPhIDC and H<sub>3</sub>MPhDC.**

| <b>H<sub>3</sub>PhIDC</b> |               | <b>H<sub>3</sub>HOPhIDC</b> |               | <b>H<sub>3</sub>MPhIDC</b> |               |
|---------------------------|---------------|-----------------------------|---------------|----------------------------|---------------|
| <b>Atom</b>               | <b>NBO</b>    | <b>Atom</b>                 | <b>NBO</b>    | <b>Atom</b>                | <b>NBO</b>    |
| <b>Number</b>             | <b>Charge</b> | <b>Number</b>               | <b>Charge</b> | <b>Number</b>              | <b>Charge</b> |
| O1                        | -0.66617      | O1                          | -0.690        | O1                         | -0.690        |
| O6                        | -0.66085      | O2                          | -0.545        | O2                         | -0.684        |
| O2                        | -0.69129      | O3                          | -0.624        | O3                         | -0.626        |
| O13                       | -0.65133      | O4                          | -0.683        | O4                         | -0.546        |
| N7                        | -0.53170      | N5                          | -0.508        | N5                         | -0.508        |
| N4                        | -0.49906      | N6                          | -0.452        | N6                         | -0.452        |
| C10                       | 0.80683       | O7                          | -0.660        | C7                         | 0.103         |
| C8                        | 0.01558       | C8                          | 0.768         | C8                         | -0.020        |
| C9                        | 0.05461       | C9                          | 0.760         | C9                         | 0.410         |
| C12                       | 0.77963       | C10                         | -0.020        | C10                        | 0.768         |
| C11                       | 0.44052       | C11                         | 0.103         | C11                        | 0.760         |
| C14                       | -0.43529      | C12                         | 0.409         | C12                        | -0.125        |
| C17                       | -0.56473      | C13                         | -0.124        | C13                        | -0.141        |
| H15                       | 0.22625       | C14                         | -0.136        | C14                        | -0.229        |
| H16                       | 0.23251       | C15                         | -0.240        | C15                        | 0.343         |
| H18                       | 0.20938       | C16                         | -0.165        | C16                        | -0.163        |
| H19                       | 0.20176       | C17                         | -0.276        | C17                        | -0.286        |
| H20                       | 0.20415       | C18                         | 0.334         | C18                        | -0.531        |
| H21                       | 0.54017       | H19                         | 0.496         | H19                        | 0.496         |
|                           |               | H20                         | 0.495         | H20                        | 0.495         |
|                           |               | H21                         | 0.240         | H21                        | 0.239         |
|                           |               | H22                         | 0.225         | H22                        | 0.225         |
|                           |               | H23                         | 0.470         | H23                        | 0.196         |
|                           |               | H24                         | 0.205         | H24                        | 0.171         |
|                           |               | H25                         | 0.193         | H25                        | 0.171         |
|                           |               | H26                         | 0.425         | H26                        | 0.215         |
|                           |               |                             |               | H27                        | 0.191         |
|                           |               |                             |               | H28                        | 0.425         |

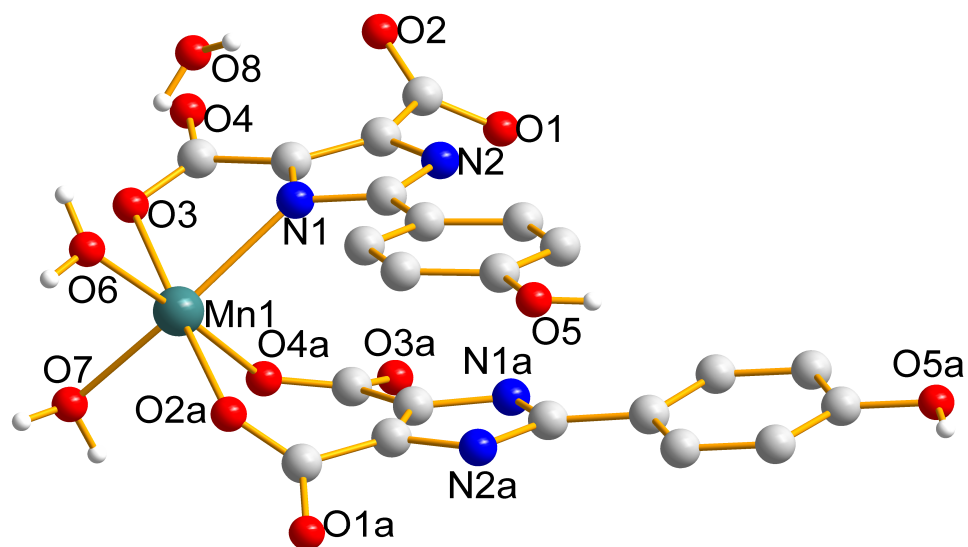

**Figure S1.** The segment of polymer **2**, showing the local coordination environment of Mn(II) ion (symmetry code: a:  $x, -y+1/2, z+1/2$ ).

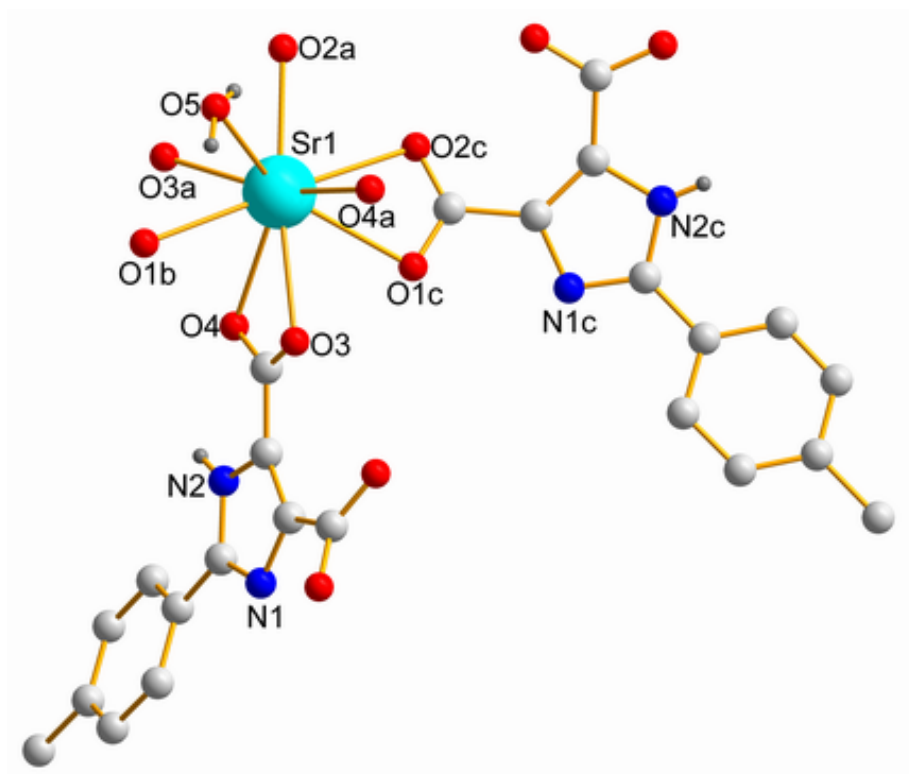

**Figure S2.** The coordination environment of the Sr(II) atom in **5** (symmetry code: a:  $1-x, -1/2+y, 1/2-z$ ; b:  $1-x, -y, -z$ ; c:  $x, -1/2-y, 1/2+z$ , partial MePhHIDC<sup>2-</sup> anions omitted for clarity).
